# Supplementary material for: Relating highly distorted Jahn–Teller MnO6 to colouration in manganese violet pigments
Source: Royal Society of Chemistry journal article supplement (doi:10.1039/c2jm33731b), 2012-01-01
Supplement: c2jm33731b.pdf [file c2jm33731b.pdf]

# **Relating Highly Distorted Jahn-Teller MnO<sub>6</sub> to Colouration in Manganese Violet Pigments**

**Yasmin Begum and Adrian J. Wright**

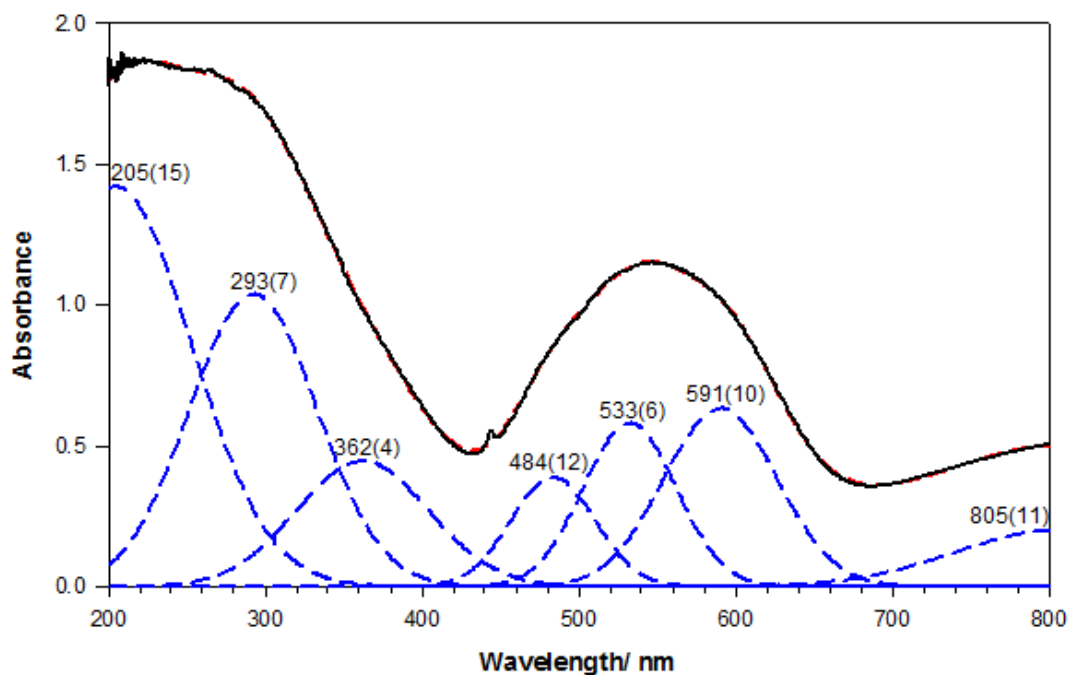

**Fig. S1** UV-visible spectrum of the  $\alpha\text{-NH}_4\text{Mn}_2\text{P}_2\text{O}_7$ , showing raw data (—), fitted Gaussian bands (---) and sum of the fitted Gaussian bands (---). Peak positions are marked.

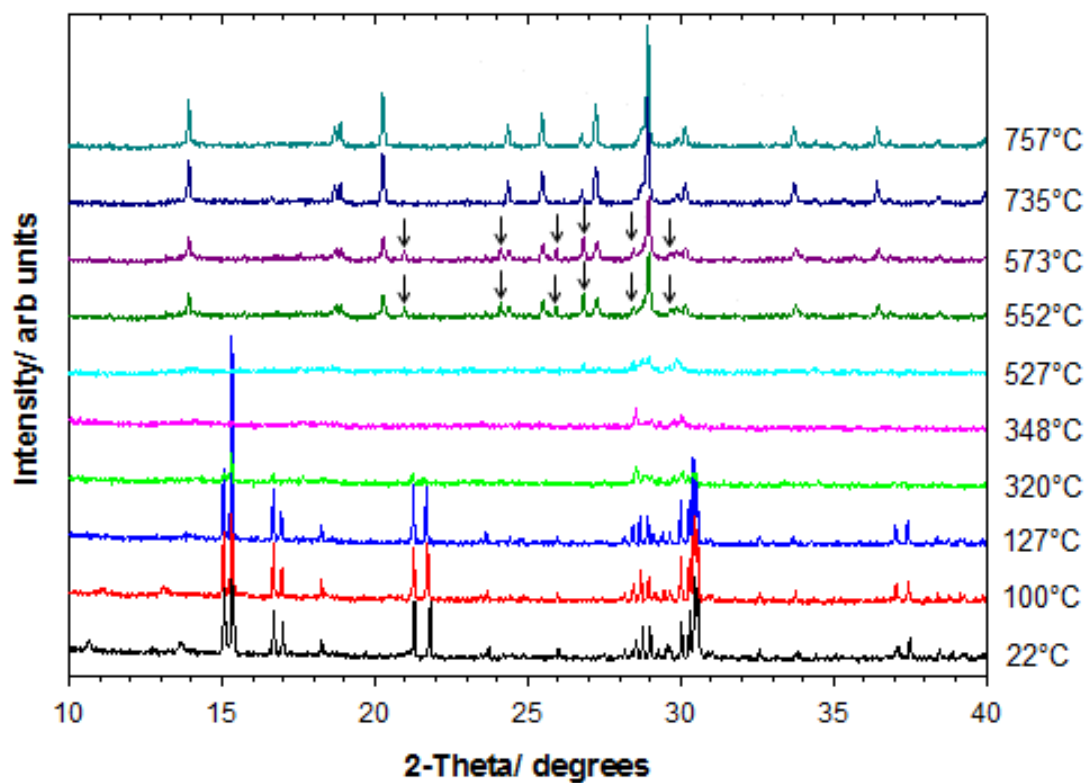

**Fig. S2** Variable temperature XRD of the VM42 compound heated under nitrogen. Arrows indicate peaks that do not belong to the  $\text{Mn}_2\text{P}_4\text{O}_{12}$  phase.

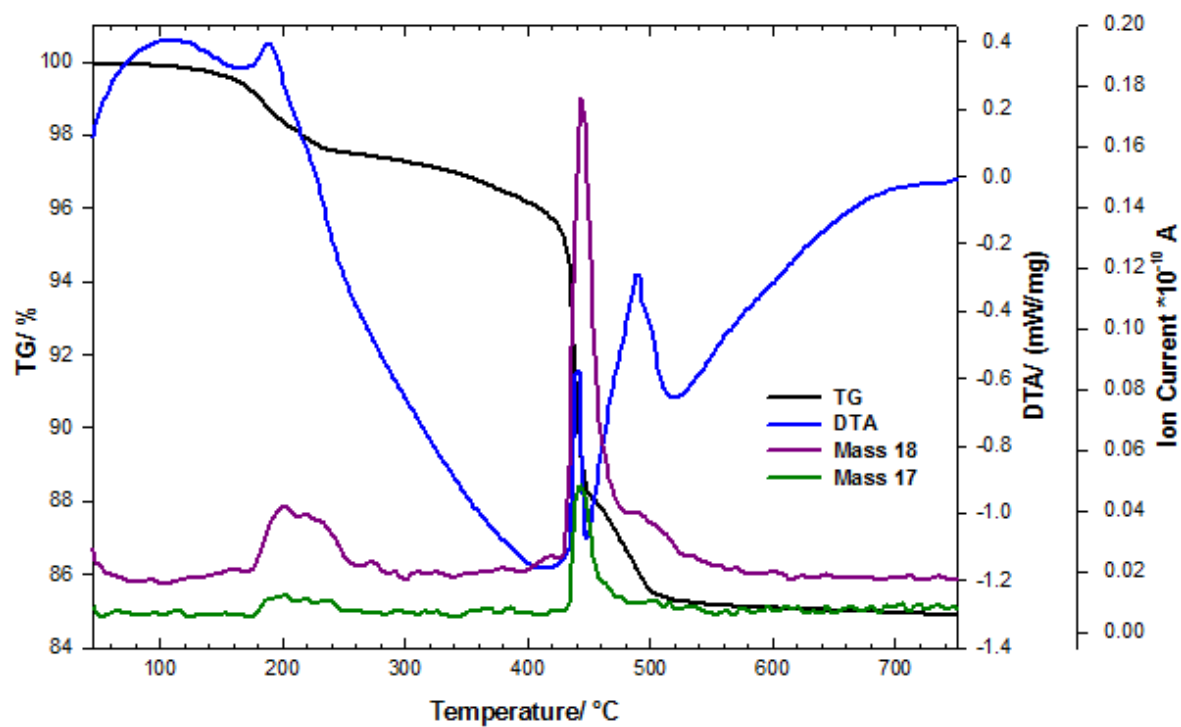

**Fig. S3** TGA-MS Plot for VM42 heated under nitrogen
